# Supplementary material
Source: PubMed Central journal article supplement (PMC7882786)

**Supplementary Material.** The weekly reported all-cause mortality in 2020 (orange), historical all-cause mortality based on previous 5-year mortality data (blue), and expected all-cause mortality based on historical all-cause mortality plus COVID-19 mortality (grey) are presented below for 22 countries.

# Austria

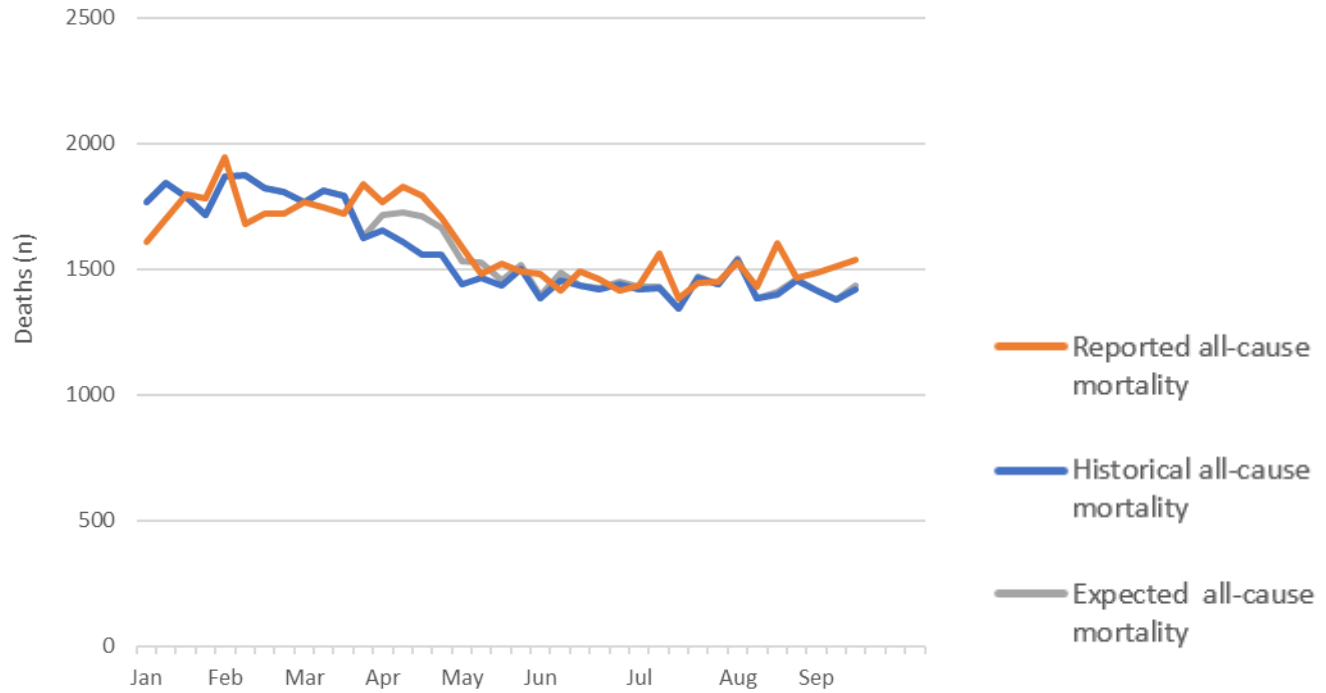

# Belgium

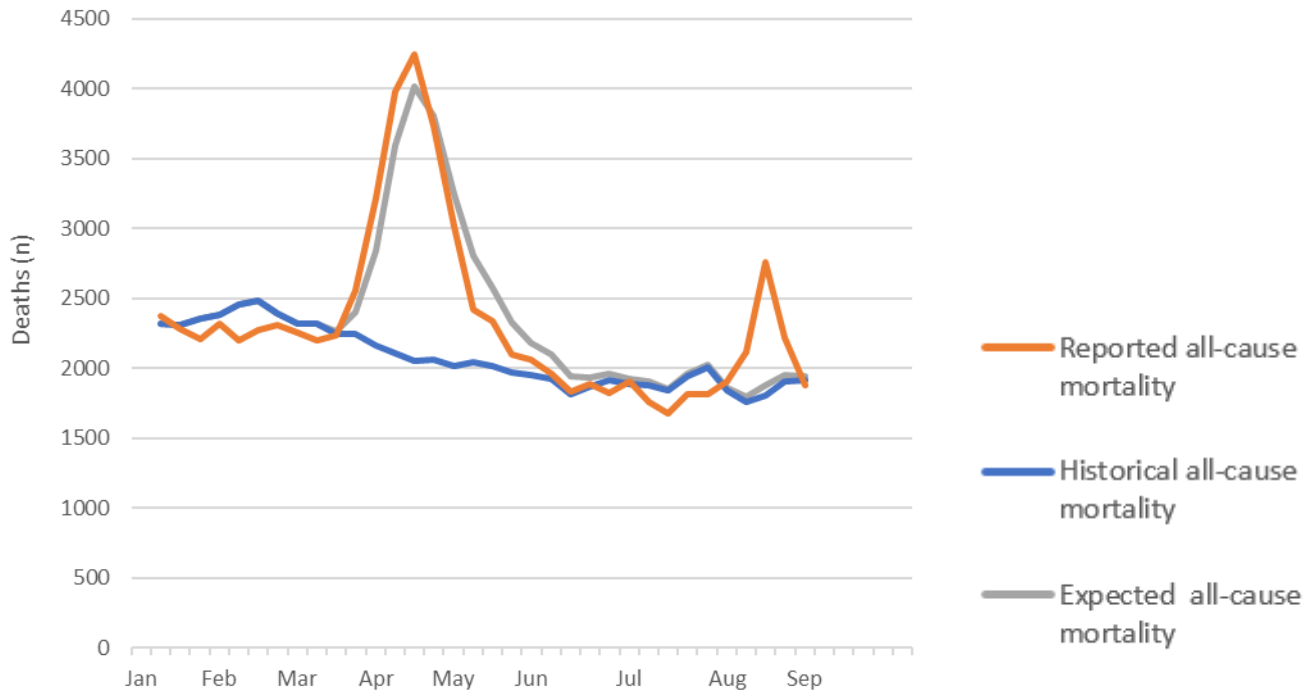

# Brazil

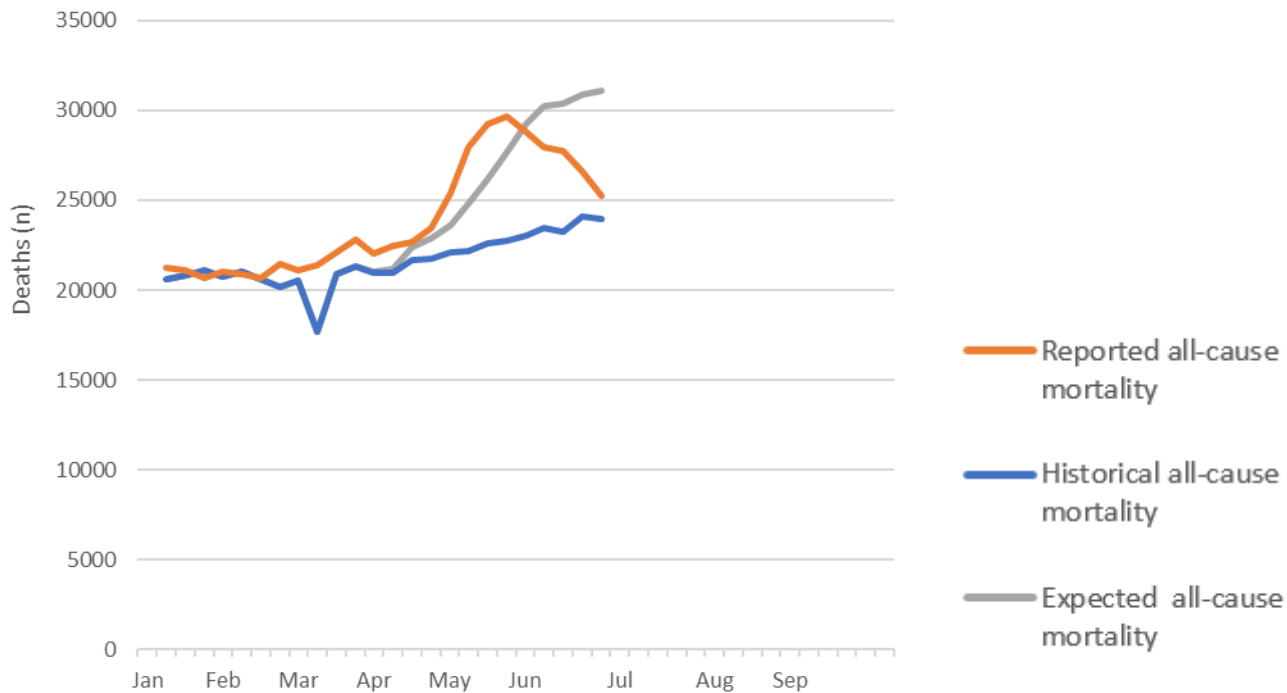

# Chile

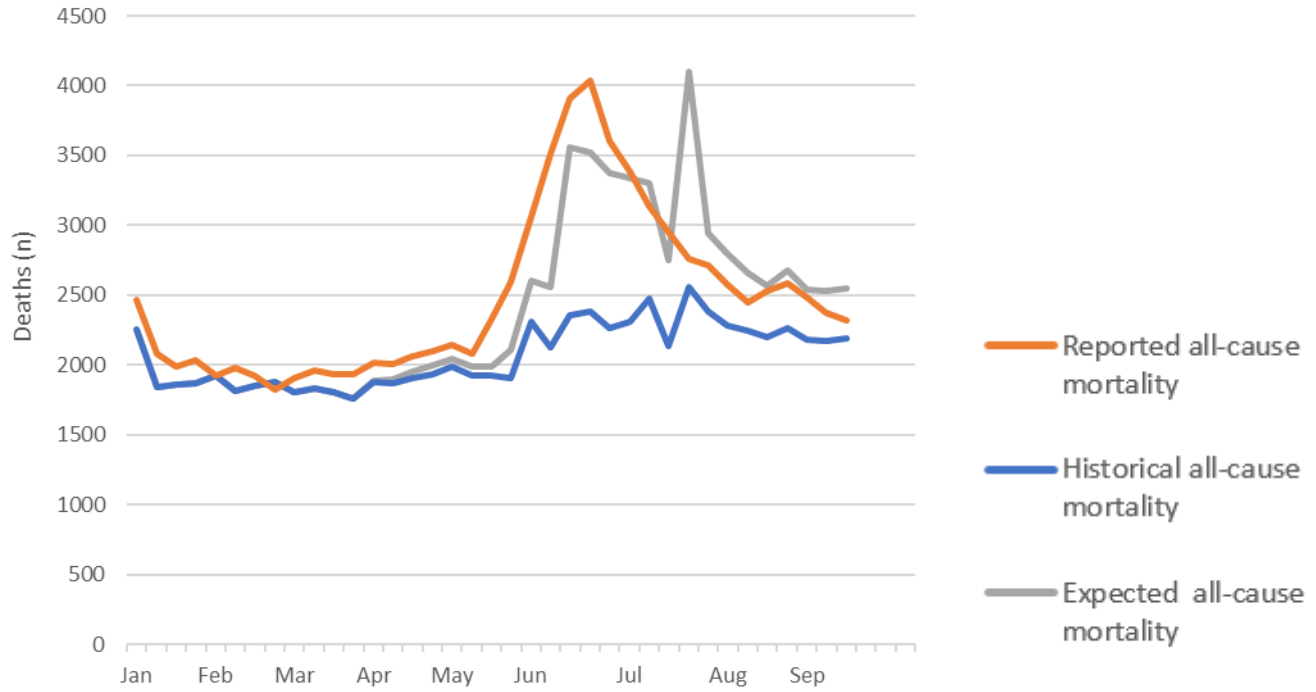

# Denmark

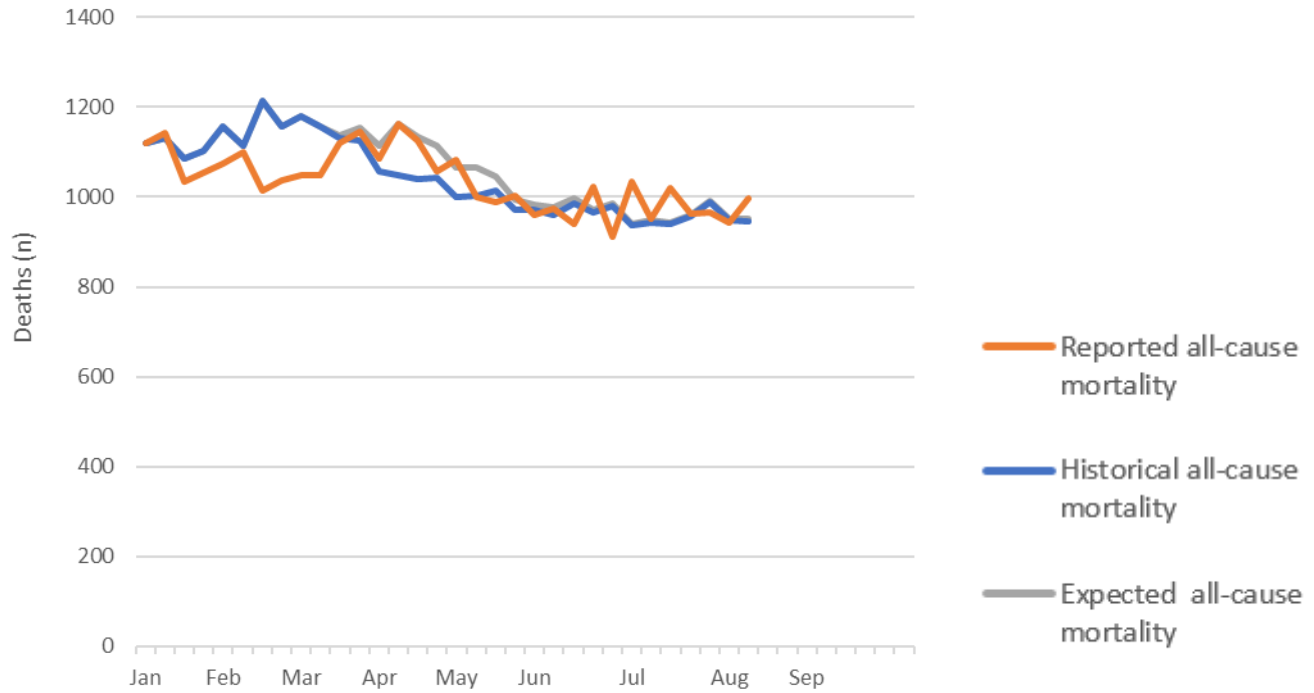

# Ecuador

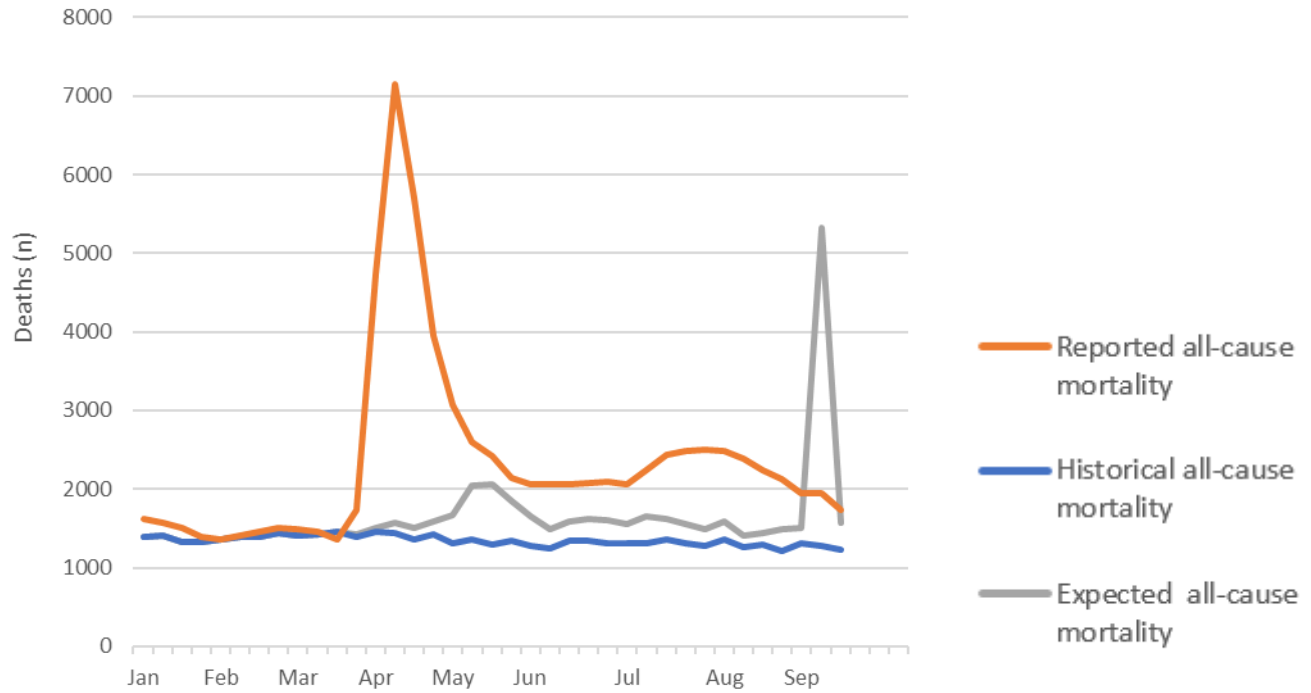

# France

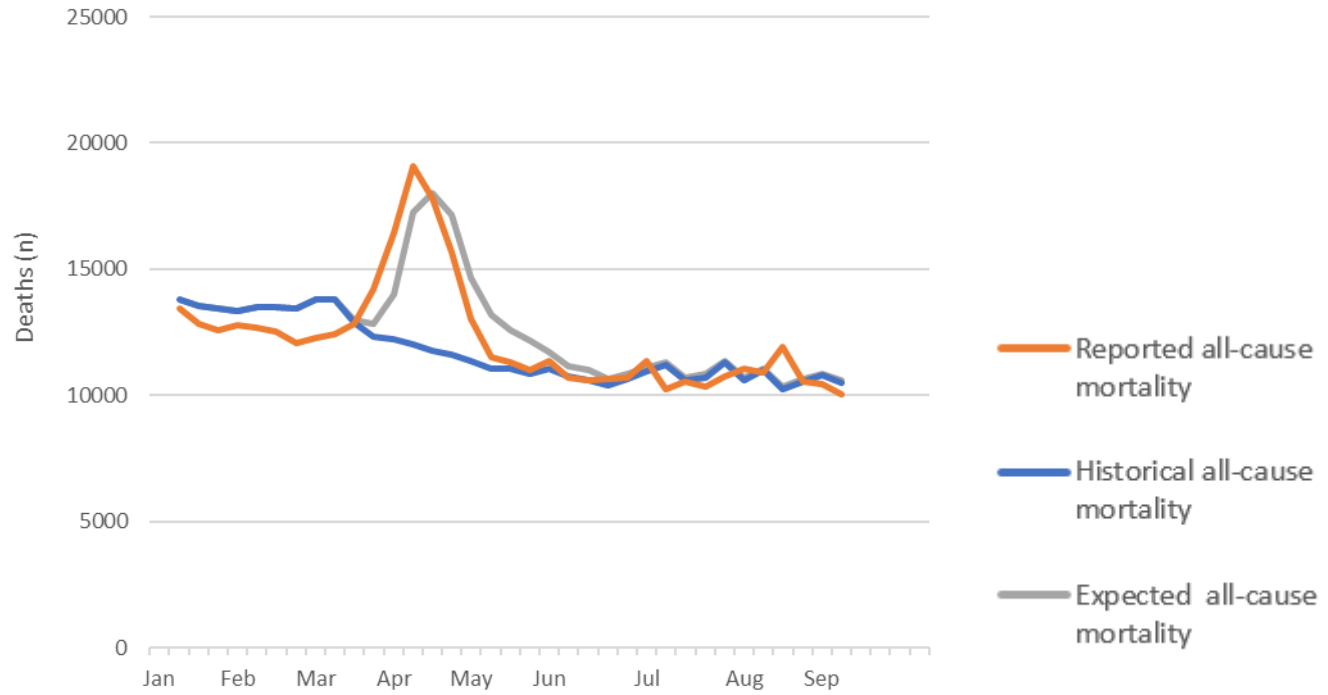



# Germany

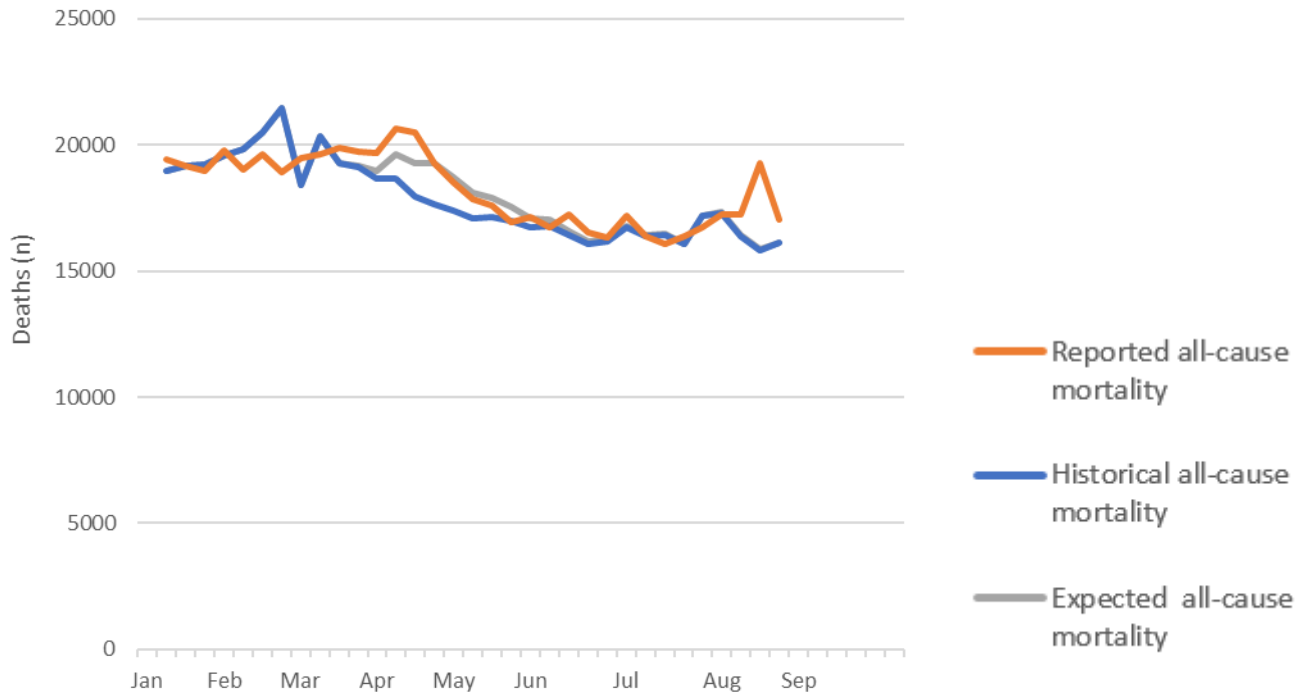

# Iceland

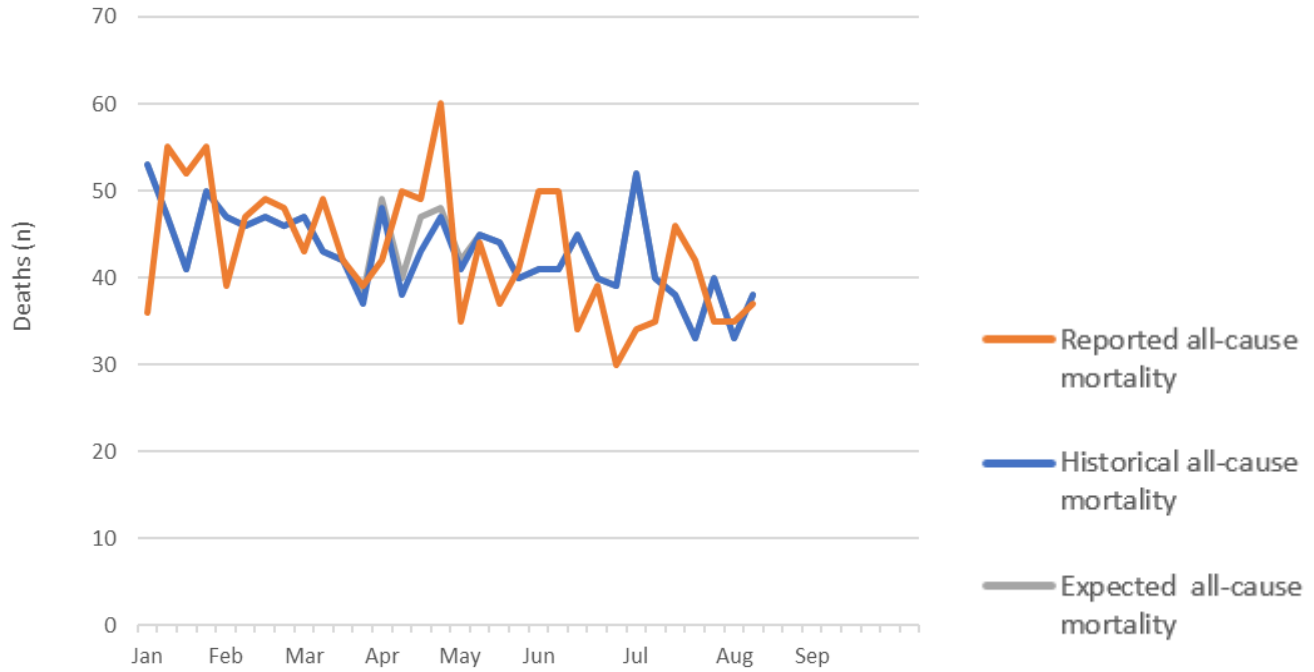

# Israel

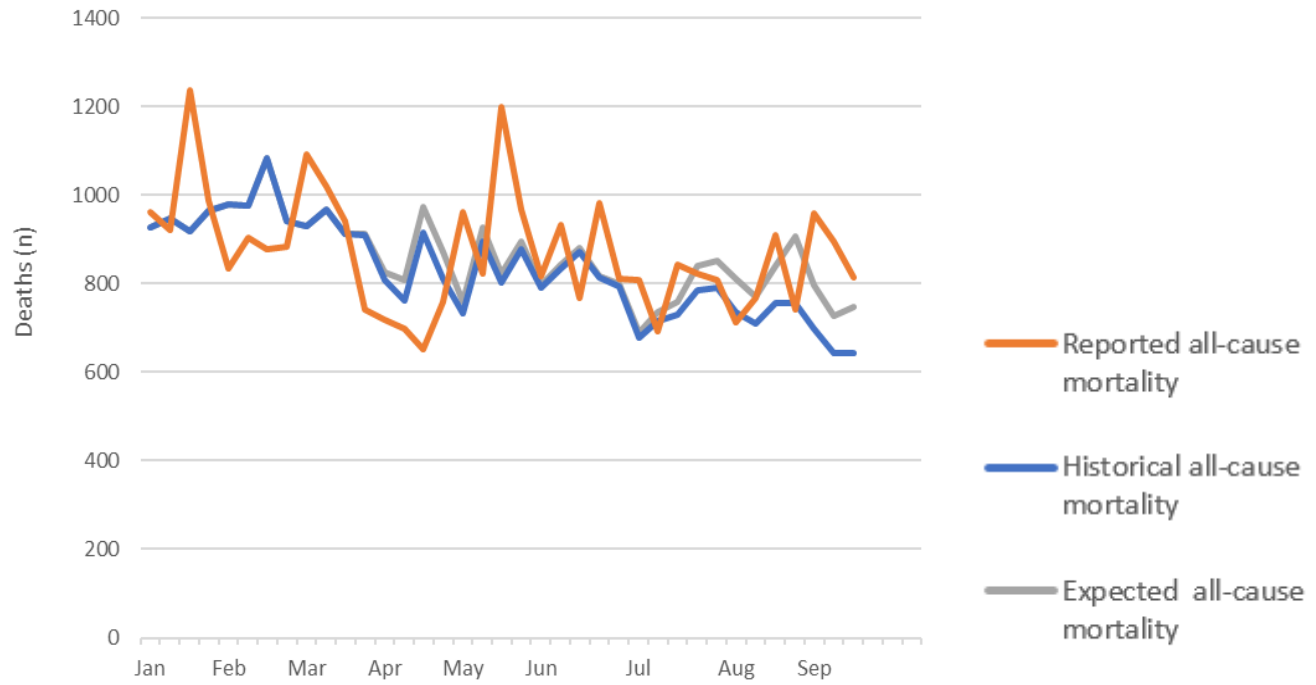

# Italy

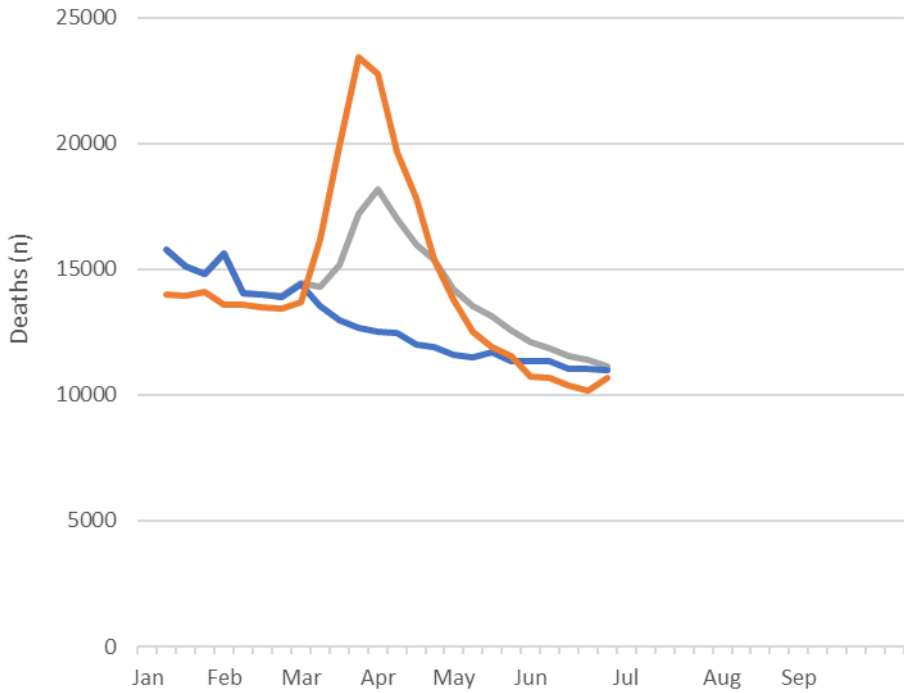

- Reported all-cause mortality
- Historical all-cause mortality
- Expected all-cause mortality

# Netherlands

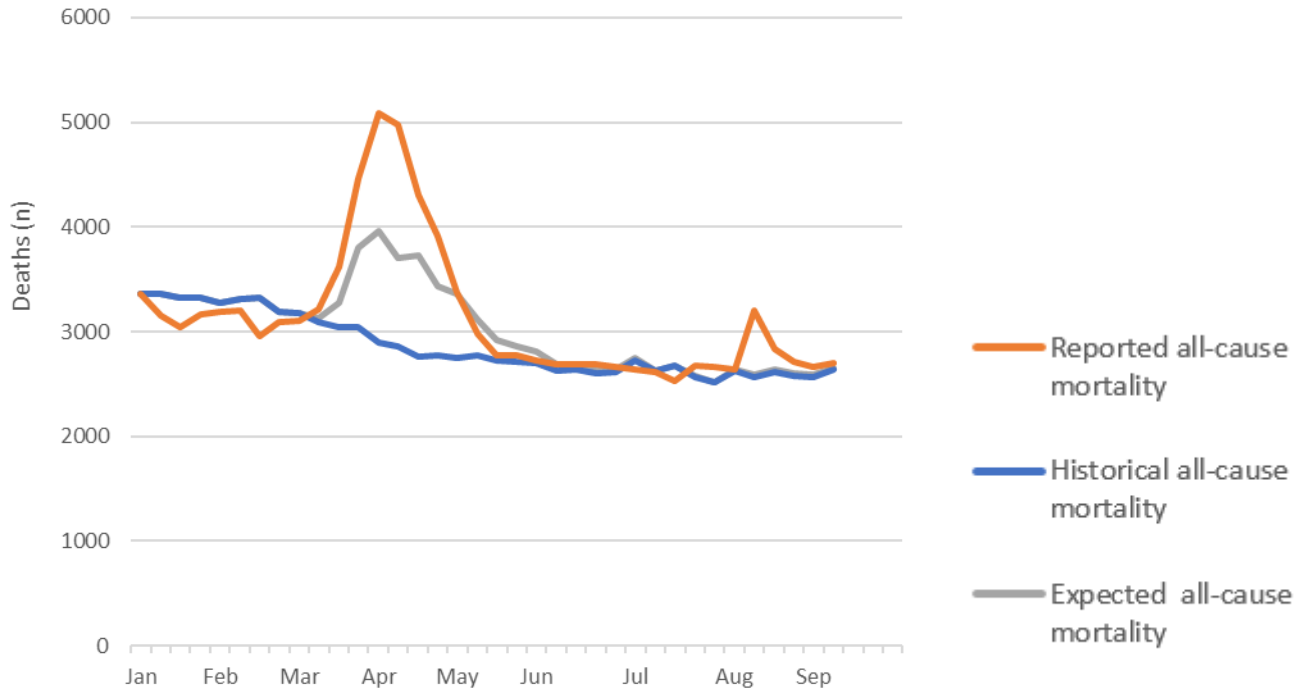

# New Zealand

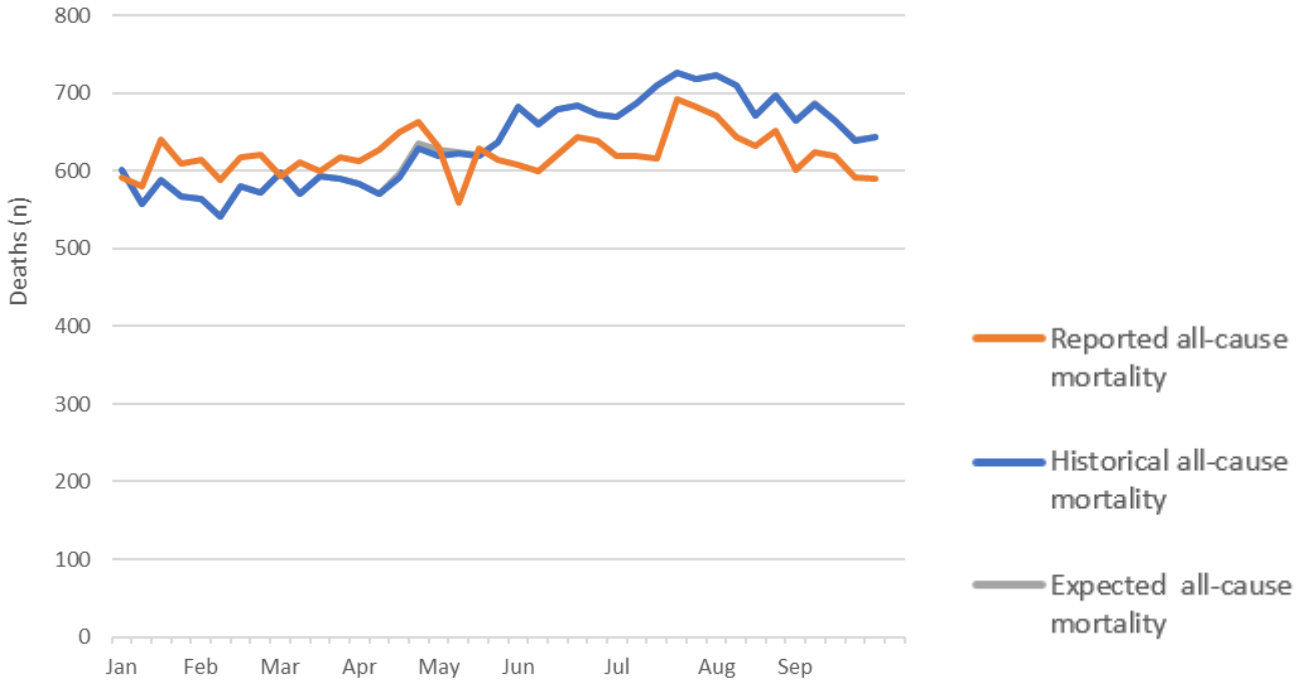

# Norway

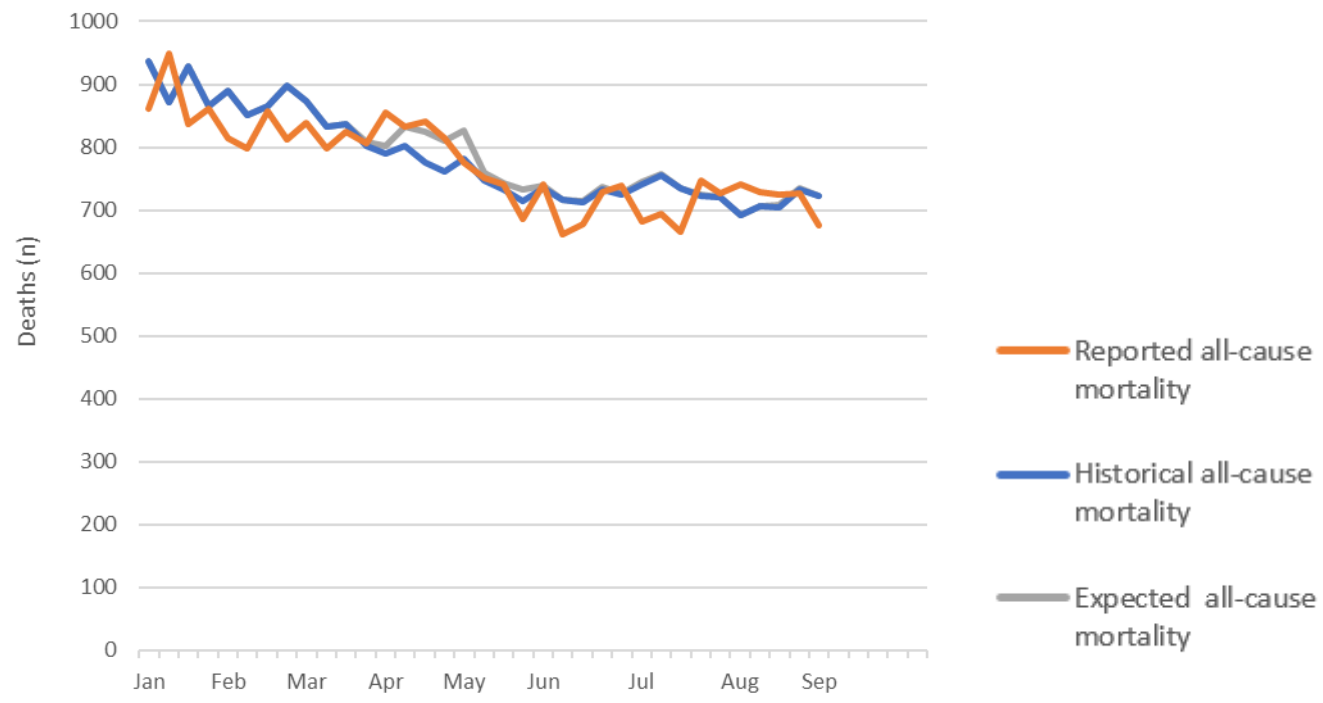

# Peru

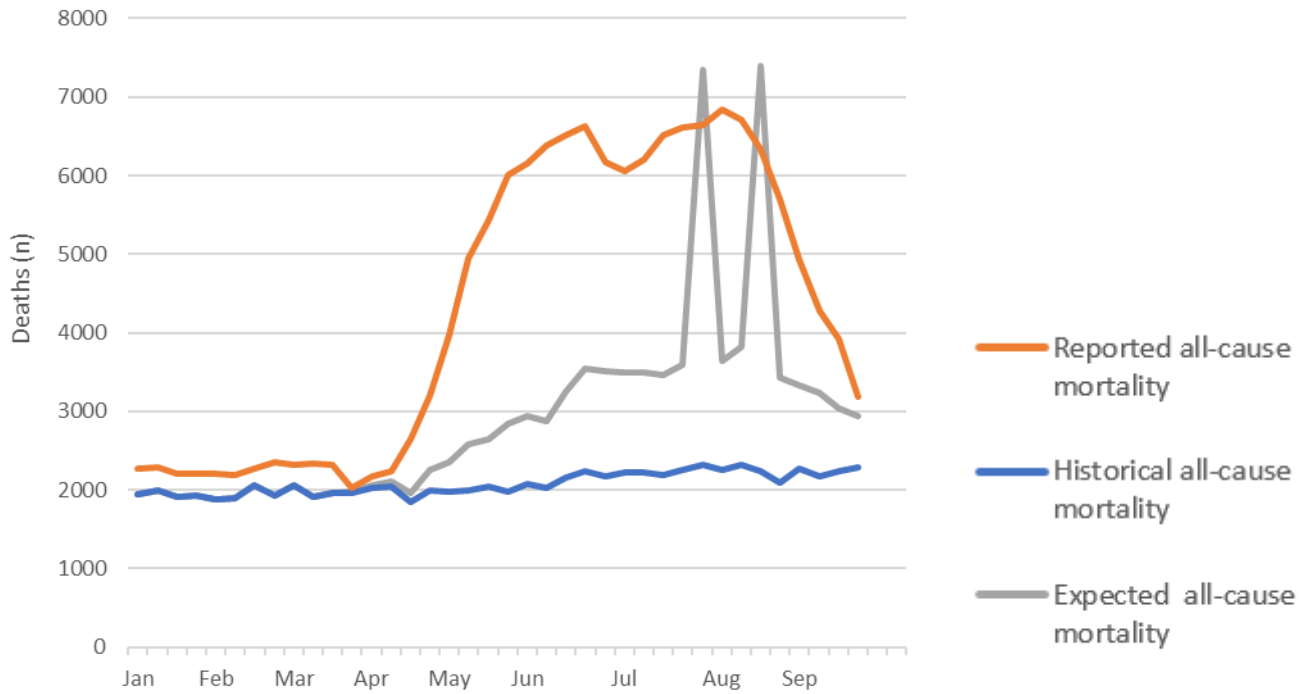



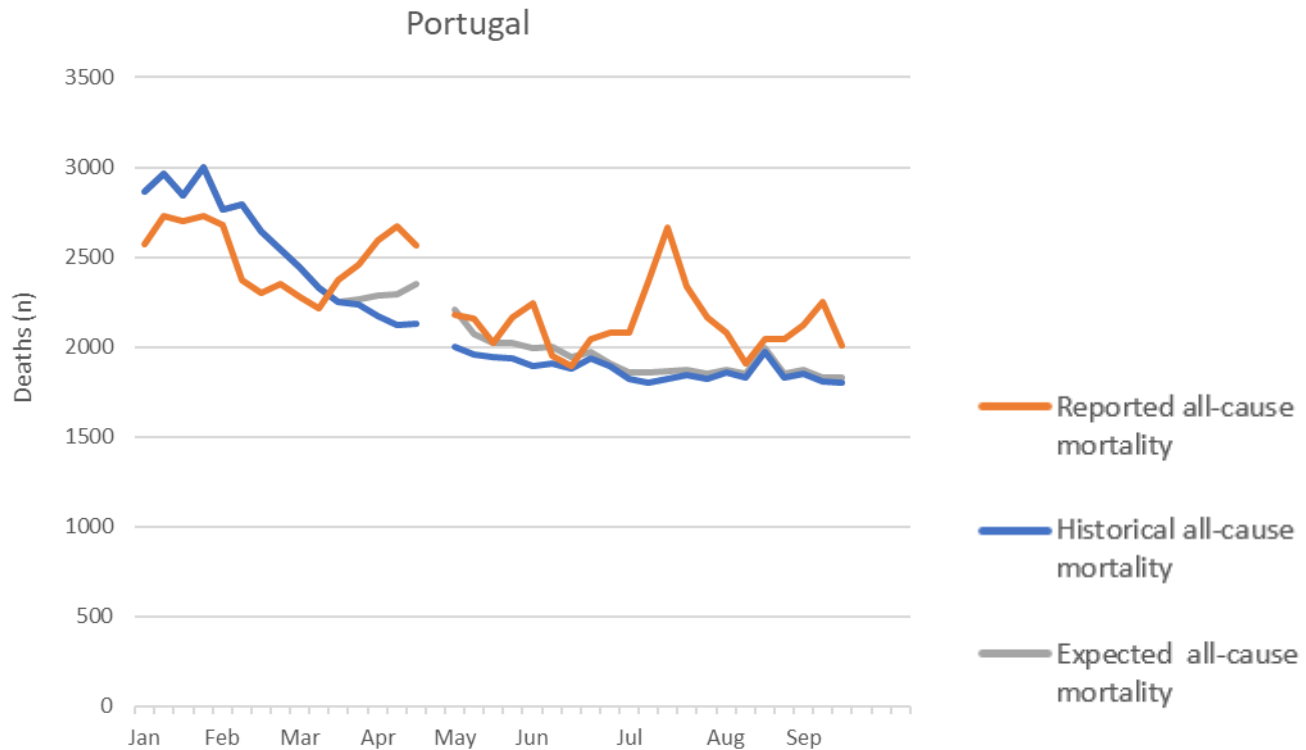

Note: Data from the week ending 21 April 2020 were missing from the Financial Times dataset.

# South Africa

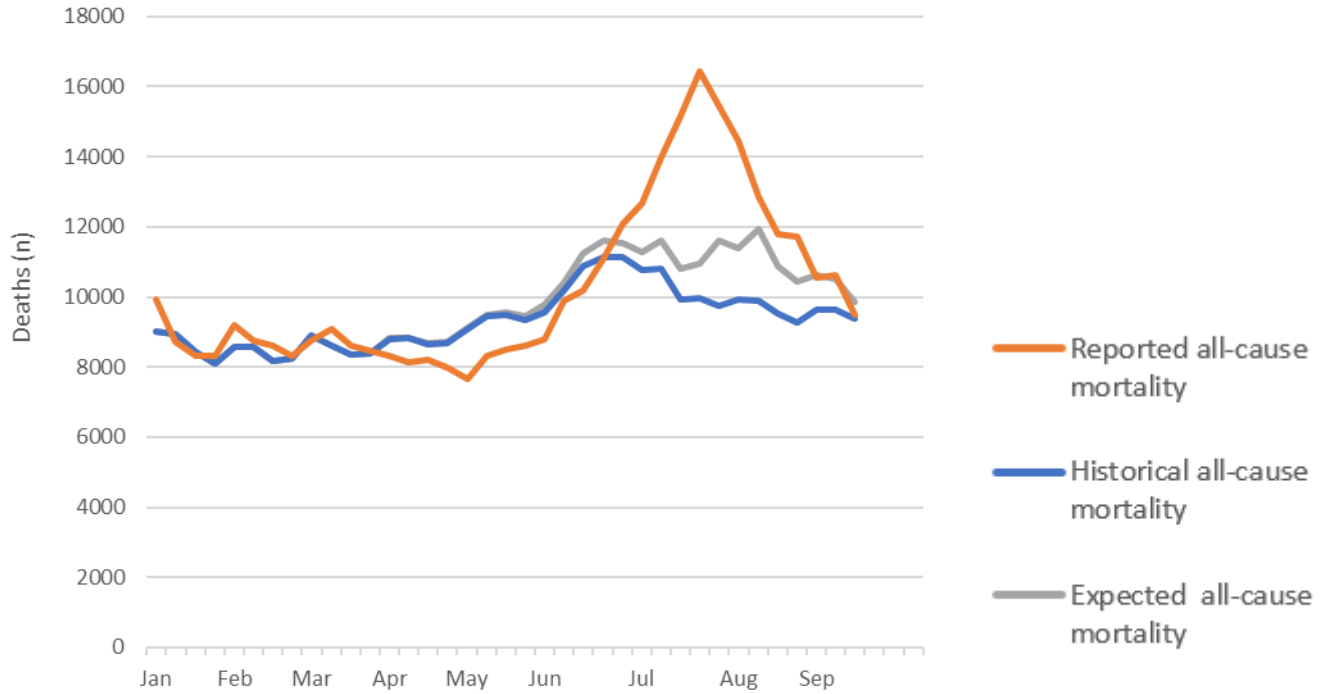

# Spain

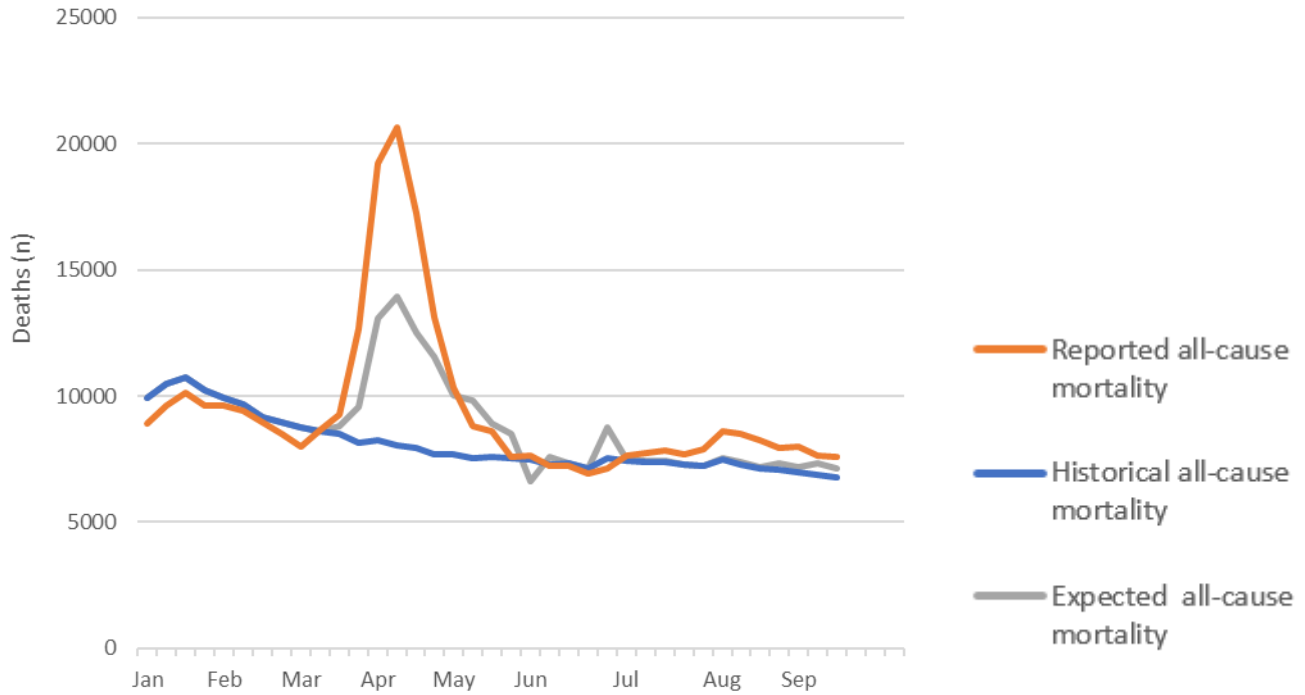

# Sweden

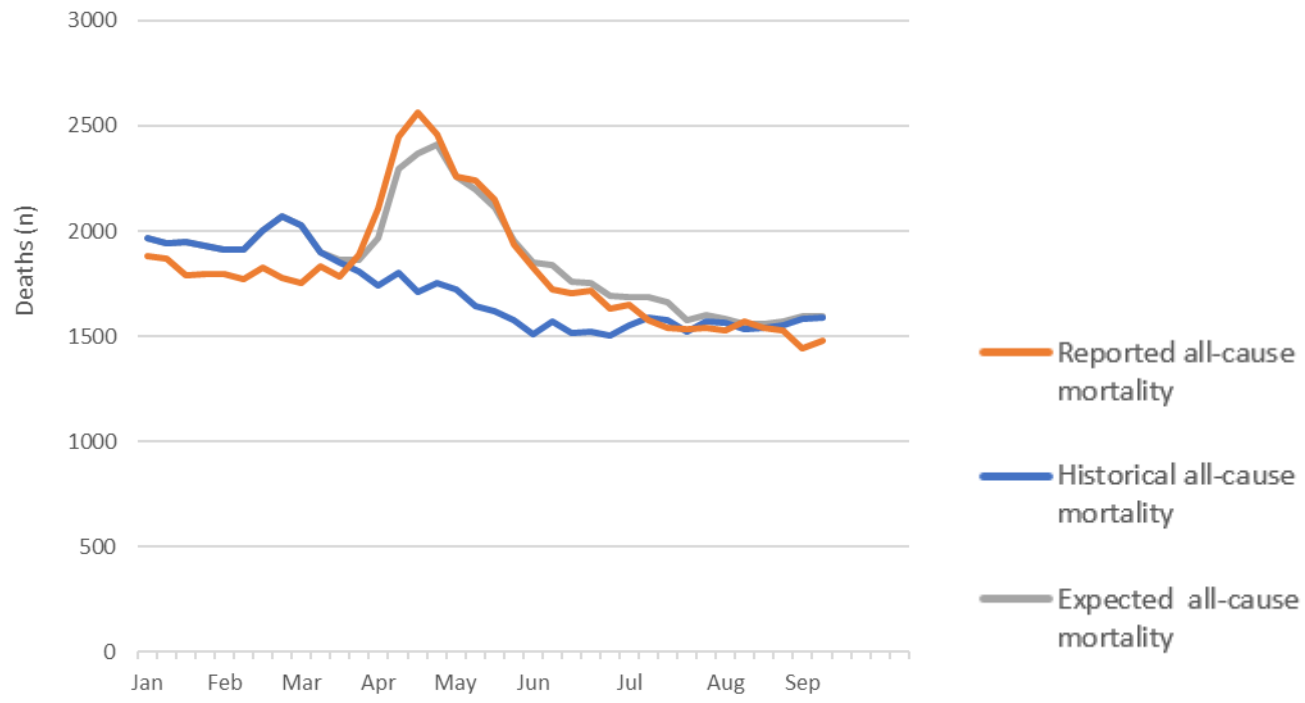

# Switzerland

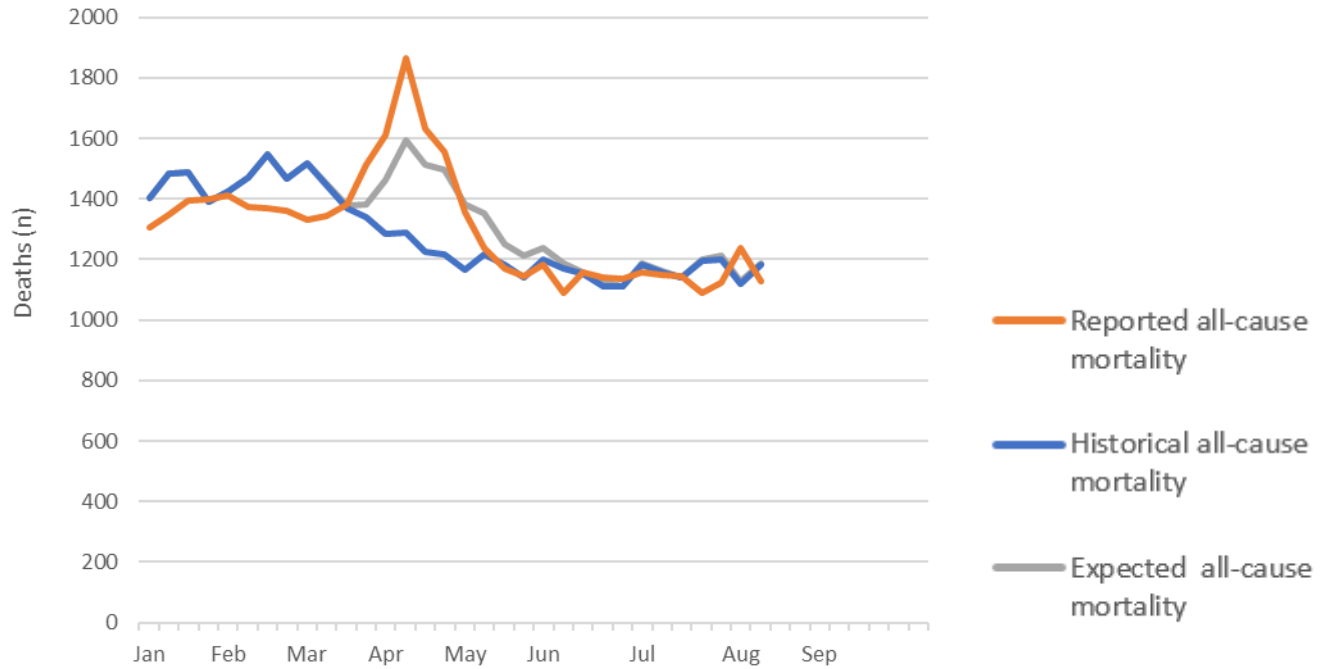

# United Kingdom

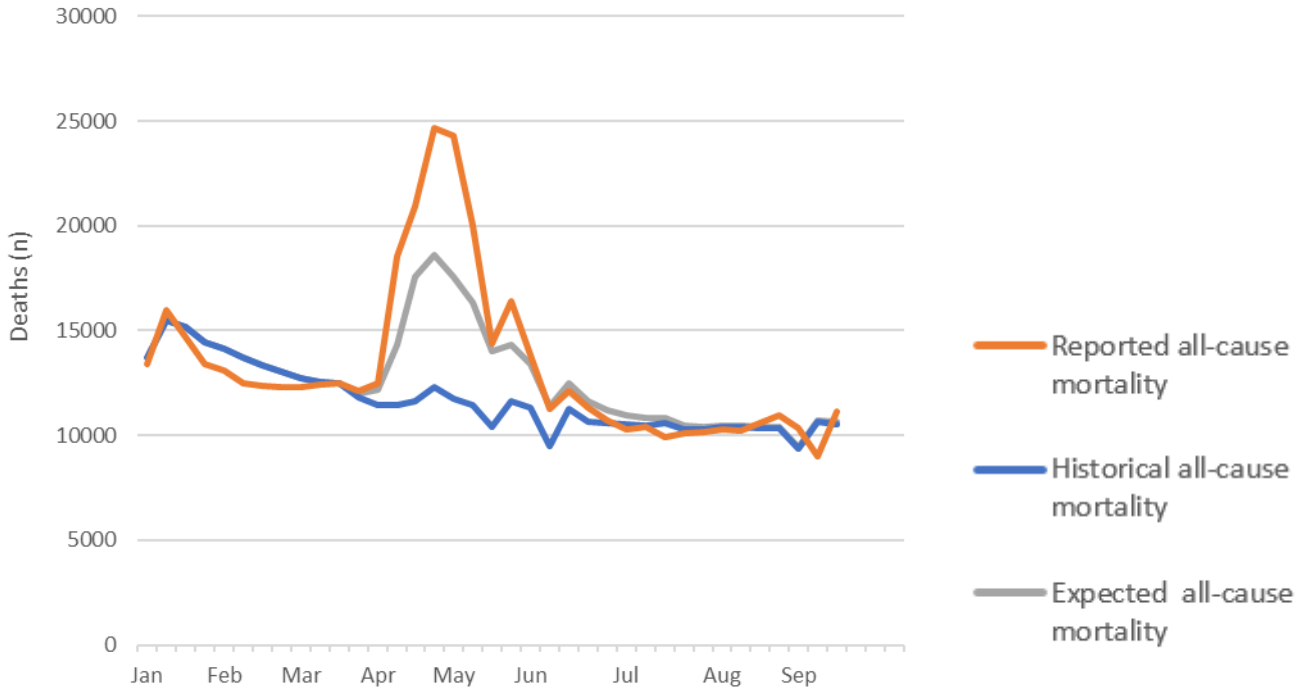

## United States of America

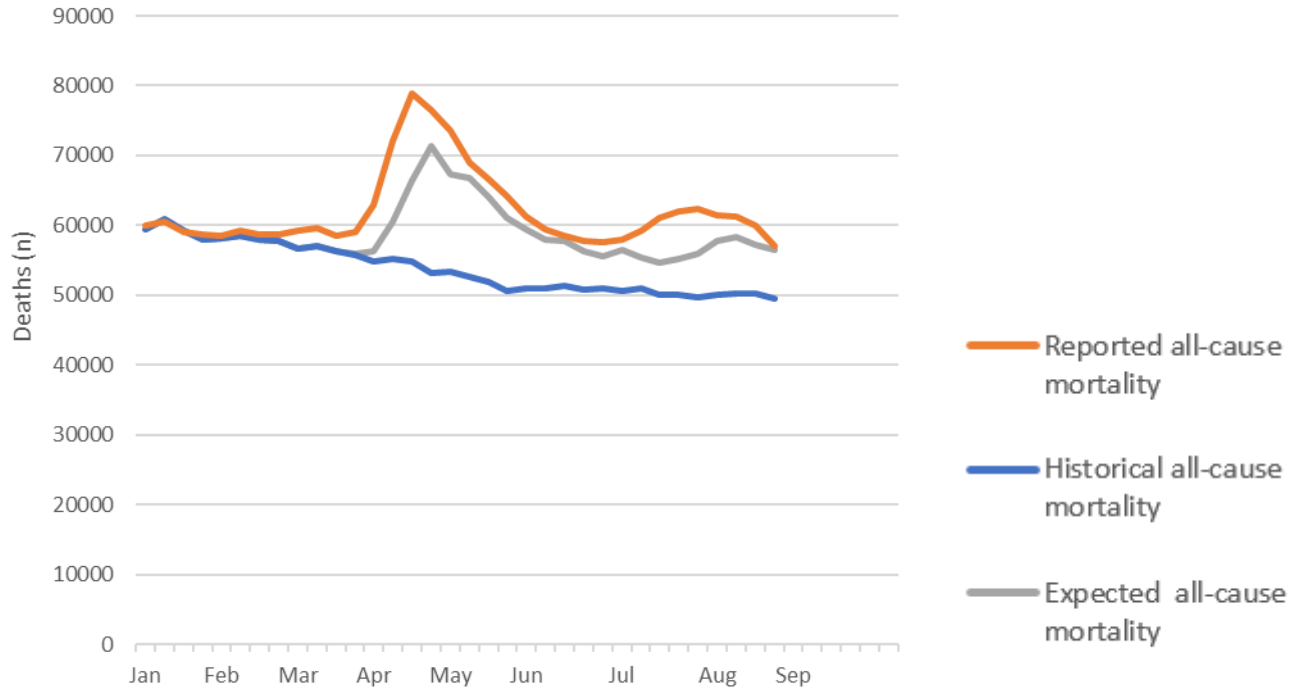

Supplement: 00766-2020.SUPPLEMENT.pdf [file 00766-2020.SUPPLEMENT.pdf]
